# Supplementary material
Source: Research Square preprint supplement (doi:10.21203/rs.3.rs-9544444/v1)
Supplement: Supplementary file 1 [file ccee2a99fdfd100e5196b0e2.xlsx]

## Sheet: Table S1
Supplemental Table S1. Procurement traceability analysis: 29 procurement tasks, February 1 – March 31, 2026.
Each row represents one Inventory Task record from the February–March 2026 window. Columns 1–8 are derived from the Inventory Task export; columns 10–13 and 14 are derived from the linked Product Lot delivery records. Column 9 ("Lot qualification required") must be entered manually based on the "Must be qualified" boolean in the Inventory master, as the corresponding flag in the Product Lot expor…
#	Task ID	Created on	Catalogue number	Item name	Ordered qty	PO number	Ordering status	Lot qualification required (enter Yes/No)	Linked delivery record(s)	Total received qty	Variance (received − ordered)	Receiving status	Notes
1	T-2026-03-02-1940	2026-02-03	11.05.01.15	IDTE PH 7.5 (1X TE SOLUTION) 1X 300 ML RES BUFFER	3	02022026-IDT	Ordered	No	D2026-03-02_1537	3	0	Complete	Lot no(s): 1110332
2	T-2026-03-02-1939	2026-02-03	11.01.02.01	INTEGRATED DNA TECH NUCLEASE FREE WATER 10X2ML	50	02022026-IDT	Ordered	No	D2026-03-02_1538	50	0	Complete	Lot no(s): 1114605
3	T-2026-03-02-1941	2026-02-03	640253	SmartChip® MyDesign Kit, 250nl	130	BX0317	Ordered	Yes	D2026-03-02_1540	130	0	Complete	Lot no(s): 2601007. Clinical batch(es): 01142026 WND Run1. PCR plate(s): 01142026 WND Run1
4	T-2026-10-02-1942	2026-02-10	10010049	GIBCO PBS PH 7.1 (1X)	10	02102026-Thermo	Ordered	No	D2026-10-02_1543	10	0	Complete	Lot no(s): 3266323
5	T-2026-10-02-1944	2026-02-10	REF: 97002540	KingFisher 96 Plate 200 uL	5	02102026-Thermo	Ordered	No	D2026-10-02_1541	5	0	Complete	Lot no(s): 25179F0
6	T-2026-10-02-1943	2026-02-10	A39176	TaqMan™ Universal DNA Spike-In Control (5X)	5	02102026-Thermo	Ordered	Yes	D2026-10-02_1542	5	0	Complete	Lot no(s): 3370179. Clinical batch(es): 02172026 WR2. PCR plate(s): 02172026 WR2
7	T-2026-12-02-1945	2026-02-12	640209	TAKARA SMARTCHIP PROBE QPCR MASTER MIX	100	BX0317	Ordered	Yes	D2026-12-02_1545	100	0	Complete	Lot no(s): 2504401A. PCR plate(s): 02182026 WND RUN 4
8	T-2026-12-02-1946	2026-02-12	640253	SmartChip® MyDesign Kit, 250nl	80	BX0317	Ordered	Yes	D2026-12-02_1544	85	5	Complete	Lot no(s): 2601202. PCR plate(s): 02182026 WND RUN 4
9	T-2026-17-02-1947	2026-02-17	3745	INTEGRA 1250 uL GRIPTIPS STERILE FILTER 10 ECO RACKS OF 96 TIPS LOW RETENTION	20	02132026-Integra	Ordered	No	D2026-17-02_1546	20	0	Complete	Lot no(s): 100002634(5x);100002637(15x)
10	T-2026-17-02-1948	2026-02-17	3825	INTEGRA 125uL Griptip sterile , filtered, 5XYZ racks of 384 tips, low retention	5	02132026-Integra	Ordered	No	D2026-17-02_1547	5	0	Complete	Lot no(s): 100002227
11	T-2026-17-02-1950	2026-02-17	76717-020	VWR Blue Light Nitrile Examination Gloves XSmall	1	02172026-Avantor	Ordered	No	D2026-17-02_1549	1	0	Complete	Lot no(s): 320250029
12	T-2026-17-02-1951	2026-02-17	76717-014	VWR Blue Light Nitrile Examination Gloves Medium	4	02172026-Avantor	Ordered	No	D2026-17-02_1548	4	0	Complete
13	T-2026-17-02-1949	2026-02-17	76500-082	Clorox® Healthcare Bleach Germicidal Wipes, Essendant 150/canister, 5×6", White	18	02172026-Avantor	Ordered	No	D2026-17-02_1550	18	0	Complete	Lot no(s): N/A
14	T-2026-17-02-1952	2026-02-17	82003-820	VWR WIPERS 11.4X21.0CM PK 280	60	02172026-Avantor	Ordered	No	D2026-17-02_1552	60	0	Complete	Lot no(s): 152015
15	T-2026-17-02-1953	2026-02-17	76332-068	TUBE MICROCENTRIFUGE 1.5ML CS5000	10	02172026-Avantor	Ordered	No	D2026-17-02_1553	10	0	Complete	Lot no(s): Batch No.26023
16	T-2026-04-03-1955	2026-03-04	A39180	APPLIED BIOSYSTEMS TAQMAN UNIVERSAL EXTRACTION CONTROL ORGANISM	6	03042026-Thermo	Ordered	Yes	D2026-04-03_1554	6	0	Complete	Lot no(s): 70073984. Clinical batch(es): 03102026 WR3. PCR plate(s): 03102026 WR3
17	T-2026-04-03-1954	2026-03-04	A39176	TaqMan™ Universal DNA Spike-In Control (5X)	6	03042026-Thermo	Ordered	Yes	D2026-04-03_1556	6	0	Complete	Lot no(s): 3260177. Clinical batch(es): 03102026 WR3. PCR plate(s): 03102026 WR3
18	T-2026-04-03-1956	2026-03-04	12223-012	ROX REFERENCE DYE	20	03042026-Thermo	Ordered	No	D2026-04-03_1555	20	0	Complete	Lot no(s): 3291850
19	T-2026-10-03-1957	2026-03-10	BDX-007	Clorox Bleach	3	Walmart	Ordered	No	D2026-10-03_1557	3	0	Complete
20	T-2026-11-03-1958	2026-03-11	640253	SmartChip® MyDesign Kit, 250nl	122	BX0317	Ordered	Yes	D2026-11-03_1560	122	0	Complete	Lot no(s): 2602207. Clinical batch(es): 03182026 WND RUN 4
21	T-2026-11-03-1959	2026-03-11	640209	TAKARA SMARTCHIP PROBE QPCR MASTER MIX	100	BX0317	Ordered	Yes	D2026-01-04_1572; D2026-11-03_1559	100	0	Complete (partial chain)	Lot no(s): 2505167A; 2504401A. Clinical batch(es): 03272026 WND RUN 6; 03182026 WND RUN 4
22	T-2026-11-03-1960	2026-03-11	4382878	Carrier RNA	50	03112026-Thermo	Ordered	Yes	D2026-18-03_1569; D2026-11-03_1562	50	0	Complete (partial chain)	Lot no(s): 3414575; 3389266. PCR plate(s): 03272026 WND RUN 6; 03182026 WND RUN 4
23	T-2026-11-03-1962	2026-03-11	3825	INTEGRA 125uL Griptip sterile , filtered, 5XYZ racks of 384 tips, low retention	10	03112026-Integra	Ordered	No	D2026-11-03_1563	10	0	Complete	Lot no(s): 100002686
24	T-2026-11-03-1961	2026-03-11	3745	INTEGRA 1250 uL GRIPTIPS STERILE FILTER 10 ECO RACKS OF 96 TIPS LOW RETENTION	30	03112026-Integra	Ordered	No	D2026-11-03_1564	30	0	Complete	Lot no(s): 100002904
25	T-2026-12-03-1963	2026-03-12	77575-268	Polystyrene reservoir 50mL	5	03122026-Avantor	Ordered	No	D2026-12-03_1565	5	0	Complete	Lot no(s): 250909336A
26	T-2026-12-03-1964	2026-03-12	12576-934	Disposable forceps	100	03122026-Avantor	Ordered	No	D2026-12-03_1568	100	0	Complete	Lot no(s): 358756
27	T-2026-12-03-1965	2026-03-12	77778-346	VWR BAG 205X305MMX50UM RDBIO ID CS400	2	03122026-Avantor	Ordered	No	D2026-12-03_1567	2	0	Complete	Lot no(s): VWR1014
28	T-2026-12-03-1966	2026-03-12	60941-126	VWR Aluminium foil for 96-well plates,127.0*77.8 mm (L*D), including single 9.5 mm end tab	25	03122026-Avantor	Ordered	No	D2026-12-03_1566	25	0	Complete	Lot no(s): 20250445
29	T-2026-25-03-1967	2026-03-25	95040450	KingFisher deep well 96 plate	30	03252026-Thermo	Ordered	No	D2026-25-03_1571	30	0	Complete	Lot no(s): 25253C0
Summary metrics
Total procurement tasks analyzed				29
Unique catalogue numbers				23
Tasks requiring lot qualification				9
Receipts classified as Complete				27
Receipts classified as Partial				0
Receipts pending				0
Receipts with non-zero variance				1
Abbreviations: PO, purchase order. The Variance column is computed automatically as Total received qty − Ordered qty; a positive value indicates over-receipt and zero indicates exact match. Lot qualification required reflects the laboratory's designation of items requiring lot-to-lot verification ("Must be qualified").
